# Supplementary material
Source: PubMed Central journal article supplement (PMC8364877)
Supplement: NIHMS1723358-supplement-1.pdf [file NIHMS1723358-supplement-1.pdf]

Supplementary Table 1.

*Final model estimates*

|                    | Fast vs.<br>Steady<br>Responders<br><i>B</i> <sup>1</sup> ( <i>p</i> -value) | Fast vs.<br>Partial<br>Responders<br><i>B</i> ( <i>p</i> -value) | Fast vs.<br>Minimal<br>Responders<br><i>B</i> ( <i>p</i> -value) | Steady vs.<br>Partial<br>Responders<br><i>B</i> ( <i>p</i> -value) | Steady vs.<br>Minimal<br>Responders<br><i>B</i> ( <i>p</i> -value) | Partial vs.<br>Minimal<br>Responders<br><i>B</i> ( <i>p</i> -value) |
|--------------------|------------------------------------------------------------------------------|------------------------------------------------------------------|------------------------------------------------------------------|--------------------------------------------------------------------|--------------------------------------------------------------------|---------------------------------------------------------------------|
| PCL-5 Intrusion    | 0.01 (.917)                                                                  | 0.08 (.146)                                                      | 0.23 (.010)*                                                     | 0.08 (.079)                                                        | 0.22 (.005)*                                                       | 0.14 (.064)                                                         |
| PCL-5 Cognition    | -0.02 (.613)                                                                 | 0.01 (.902)                                                      | 0.14 (.051)                                                      | 0.03 (.478)                                                        | 0.16 (.015)*                                                       | 0.14 (.039)*                                                        |
| PCL-5 Hyperarousal | 0.10 (.057)                                                                  | 0.09 (.123)                                                      | 0.27 (.002)*                                                     | -0.01 (.778)                                                       | 0.17 (.028)*                                                       | 0.18 (.017)*                                                        |
| PTCI               | 0.01 (.011)*                                                                 | 0.03 (<.001)*                                                    | 0.04 (<.001)*                                                    | 0.01 (.004)*                                                       | 0.02 (<.001)*                                                      | 0.01 (.099)                                                         |
| CAPS-5 Intrusion   | 0.37 (.198)                                                                  | 0.71 (.023)*                                                     | 0.71 (.112)                                                      | 0.34 (.140)                                                        | 0.34 (.372)                                                        | <0.01 (.998)                                                        |
| CAPS-5 Avoidance   | 0.32 (.133)                                                                  | 0.54 (.029)*                                                     | 0.47 (.214)                                                      | 0.22 (.276)                                                        | 0.15 (.668)                                                        | -0.07 (.834)                                                        |

*Note:* <sup>1</sup>Slopes represent the increase in log odds of being in the poorer performing trajectory group associated with a one-point increase in covariate score.
